# Supplementary material for: Dietary EPA+DHA Mitigate Hepatic Toxicity and Modify the Oxylipin Profile in an Animal Model of Colorectal Cancer Treated with Chemotherapy
Source: MDPI journal article supplement (doi:10.3390/cancers14225703), 2022-11-21
Supplement: s1 [file s1]

**Supplemental Table S1:** Liver oxylipins in reference, tumor, chemotherapy, and fish oil group animals.

| Oxylipins (pg/mg)     | PUFA | Reference               | Tumor                   | Chemo                   | Fish Oil               | P-value |
|-----------------------|------|-------------------------|-------------------------|-------------------------|------------------------|---------|
| 9-HODE                | LA   | 116±18.3 <sup>a</sup>   | 143±15.1 <sup>a</sup>   | 133±30.4 <sup>a</sup>   | 79.1±18.8 <sup>b</sup> | <.001   |
| 9-OxoODE              |      | 108±14.7                | 89.5±17.4               | 88.6±21.8               | 62.2±21.6              | 0.016   |
| 13-HODE               |      | 116±25.7 <sup>a</sup>   | 122±10.4 <sup>a</sup>   | 127±29.4 <sup>a</sup>   | 68.9±15.0 <sup>b</sup> | <.001   |
| 13-OxoODE             |      | 31.1±8.42 <sup>a</sup>  | 27.3±8.51 <sup>a</sup>  | 24.1±7.30 <sup>a</sup>  | 13.8±2.92 <sup>b</sup> | 0.004   |
| 9,10,13-TriHOME       |      | 50.0±11.3 <sup>a</sup>  | 50.7±8.42 <sup>a</sup>  | 66.4±29.7 <sup>a</sup>  | 28.4±2.52 <sup>b</sup> | 0.002   |
| 9,12,13-TriHOME       |      | 16.2±2.94 <sup>a</sup>  | 16.7±2.71 <sup>a</sup>  | 22.0±10.9 <sup>a</sup>  | 9.56±1.21 <sup>b</sup> | 0.002   |
| 9,10-DiHOME           |      | 11.2±4.65               | 11.9±3.77               | 14.3±5.75               | 5.87±1.16              | 0.015   |
| 12,13-DiHOME          |      | 7.32±2.02               | 6.71±0.93               | 6.25±1.55               | 4.97±1.82              | 0.126   |
| 9,10-EpOME            |      | 2.75±1.45               | 2.30±0.99               | 1.66±0.64               | 1.02±0.54              | 0.013   |
| 13-HOTrE-γ            | GLA  | 5.89±1.82 <sup>a</sup>  | 6.74±1.45 <sup>a</sup>  | 5.47±1.65 <sup>a</sup>  | 1.99±0.41 <sup>b</sup> | <.001   |
| PGD <sub>1</sub>      | DGLA | 1.44±0.42 <sup>a</sup>  | 1.31±0.26 <sup>a</sup>  | 1.34±0.39 <sup>a</sup>  | 0.32±0.29 <sup>b</sup> | <.001   |
| 15k-PGE <sub>1</sub>  |      | 0.17±0.03 <sup>a</sup>  | 0.17±0.02 <sup>a</sup>  | 0.15±0.01 <sup>a</sup>  | 0.11±0.03 <sup>b</sup> | <.001   |
| 8-HETrE               |      | 2.35±0.53 <sup>a</sup>  | 2.09±0.65 <sup>ab</sup> | 1.58±0.44 <sup>bc</sup> | 1.26±0.33 <sup>c</sup> | 0.006   |
| 15-HETrE              |      | 9.76±2.43 <sup>a</sup>  | 11.0±1.29 <sup>a</sup>  | 9.17±2.57 <sup>a</sup>  | 6.33±1.23 <sup>b</sup> | 0.006   |
| PGA <sub>2</sub>      |      | 0.64±0.26 <sup>b</sup>  | 0.68±0.22 <sup>b</sup>  | 1.56±1.36 <sup>a</sup>  | 0.69±0.38 <sup>b</sup> | <.001   |
| PGD <sub>2</sub>      | AA   | 43.8±7.52 <sup>a</sup>  | 36.7±8.01 <sup>a</sup>  | 46.9±17.5 <sup>a</sup>  | 13.8±4.59 <sup>b</sup> | <.001   |
| 15Δ-PGD <sub>2</sub>  |      | 0.12±0.03               | 0.14±0.03               | 0.19±0.11               | 0.10±0.06              | 0.112   |
| PGE <sub>2</sub>      |      | 16.3±4.46 <sup>a</sup>  | 15.1±1.94 <sup>a</sup>  | 17.5±4.16 <sup>a</sup>  | 5.51±1.17 <sup>b</sup> | <.001   |
| 11β-PGE <sub>2</sub>  |      | 4.60±1.17 <sup>a</sup>  | 4.10±0.51 <sup>a</sup>  | 4.69±1.07 <sup>a</sup>  | 1.53±0.34 <sup>b</sup> | <.001   |
| 15k-PGE <sub>2</sub>  |      | 6.44±2.06 <sup>a</sup>  | 5.71±1.09 <sup>a</sup>  | 5.41±1.18 <sup>a</sup>  | 2.27±0.61 <sup>b</sup> | <.001   |
| PGF <sub>2α</sub>     |      | 48.0±12.0 <sup>a</sup>  | 45.8±5.34 <sup>a</sup>  | 51.8±10.9 <sup>a</sup>  | 16.8±2.86 <sup>b</sup> | 0.003   |
| Dhk-PGF <sub>2α</sub> |      | 1.29±0.58 <sup>ab</sup> | 2.15±0.41 <sup>a</sup>  | 1.50±0.45 <sup>ab</sup> | 0.27±0.59 <sup>b</sup> | <.001   |
| 6k-PGF <sub>1α</sub>  |      | 4.37±1.60 <sup>b</sup>  | 4.47±0.78 <sup>b</sup>  | 6.32±3.69 <sup>a</sup>  | 1.72±0.44 <sup>c</sup> | <.001   |
| 15k-PGF <sub>2α</sub> |      | 22.3±6.26 <sup>a</sup>  | 21.8±2.86 <sup>a</sup>  | 21.7±4.74 <sup>a</sup>  | 8.69±2.49 <sup>a</sup> | <.001   |
| PGJ <sub>2</sub>      |      | 0.40±0.13               | 0.42±0.13               | 0.83±0.69               | 0.40±0.20              | 0.381   |
| 15Δ-PGJ <sub>2</sub>  |      | 1.67±1.14               | 1.66±0.93               | 5.20±4.00               | 1.31±1.08              | 0.095   |
| TXB <sub>2</sub>      |      | 19.7±3.30 <sup>ab</sup> | 15.4±2.38 <sup>b</sup>  | 24.8±8.50 <sup>a</sup>  | 5.87±2.22 <sup>c</sup> | <.001   |
| 12-HHTrE              |      | 289±49.4 <sup>a</sup>   | 298±56.0 <sup>a</sup>   | 316±57.4 <sup>a</sup>   | 102±25.7 <sup>b</sup>  | <.001   |
| 5-HETE                |      | 21.9±1.73 <sup>a</sup>  | 17.8±1.93 <sup>b</sup>  | 16.5±1.57 <sup>b</sup>  | 10.3±1.28 <sup>c</sup> | <.001   |
| 5-OxoETE              |      | 8.46±1.49 <sup>a</sup>  | 5.98±1.46 <sup>b</sup>  | 6.40±1.68 <sup>b</sup>  | 3.59±0.75 <sup>c</sup> | <.001   |
| 8-HETE                |      | 27.0±5.00 <sup>a</sup>  | 24.2±7.72 <sup>ab</sup> | 18.1±6.24 <sup>bc</sup> | 11.9±2.53 <sup>c</sup> | 0.001   |
| 9-HETE                |      | 29.0±6.11 <sup>a</sup>  | 22.7±5.04 <sup>b</sup>  | 21.2±4.46 <sup>b</sup>  | 14.0±3.57 <sup>c</sup> | <.001   |
| 11-HETE               |      | 29.1±8.32               | 29.3±5.36               | 25.2±8.49               | 16.7±3.95              | 0.018   |
| 12-HETE               |      | 48.4±11.5 <sup>a</sup>  | 39.7±7.90 <sup>a</sup>  | 27.8±8.52 <sup>ab</sup> | 17.0±6.93 <sup>c</sup> | <.001   |
| 12-OxoETE             |      | 46.1±14.3 <sup>a</sup>  | 32.7±8.28 <sup>b</sup>  | 31.6±9.78 <sup>b</sup>  | 13.3±2.26 <sup>c</sup> | <.001   |
| 15-HETE               |      | 43.9±6.83 <sup>a</sup>  | 47.7±8.13 <sup>a</sup>  | 45.6±17.1 <sup>a</sup>  | 26.7±5.83 <sup>b</sup> | <.001   |
| 15-OxoETE             |      | 5.24±1.33 <sup>a</sup>  | 3.68±0.96 <sup>b</sup>  | 3.49±1.16 <sup>b</sup>  | 2.53±0.73 <sup>b</sup> | 0.004   |
| 5,15-DiHETE           |      | 0.82±0.23               | 0.94±0.39               | 0.77±0.15               | 1.94±1.50              | 0.663   |

|                              |     |                         |                         |                          |                        |        |
|------------------------------|-----|-------------------------|-------------------------|--------------------------|------------------------|--------|
| 8,15-DiHETE                  |     | 7.96±1.28               | 8.62±2.64               | 8.09±2.00                | 7.65±2.54              | 0.895  |
| 5,6-DiHETrE                  |     | 1.71±0.52 <sup>a</sup>  | 1.39±0.22 <sup>ab</sup> | 1.07±0.13 <sup>bc</sup>  | 0.96±0.31 <sup>c</sup> | 0.002  |
| 8,9-DiHETrE                  |     | 4.65±1.72               | 4.47±0.91               | 5.41±1.49                | 3.02±0.77              | 0.039  |
| 11,12-DiHETrE                |     | 5.42±1.93               | 5.03±1.15               | 6.56±2.81                | 2.65±0.79              | 0.017  |
| 14,15-DiHETrE                |     | 5.31±1.40               | 4.72±0.61               | 5.37±1.86                | 3.25±0.98              | 0.048  |
| 5,6-EpETrE                   |     | 4.66±1.01 <sup>a</sup>  | 4.05±1.28 <sup>a</sup>  | 3.84±0.93 <sup>a</sup>   | 1.85±0.53 <sup>b</sup> | <.001  |
| 11,12-EpETrE                 |     | 2.02±0.84 <sup>a</sup>  | 1.63±0.61 <sup>ab</sup> | 1.14±0.50 <sup>bc</sup>  | 0.55±0.19 <sup>c</sup> | 0.002  |
| 14,15-EpETrE                 |     | 0.58±0.34               | 0.40±0.11               | 0.31±0.17                | 0.24±0.13              | 0.030  |
| 16-HETE                      |     | 15.3±3.08               | 22.4±6.19               | 14.9±7.94                | 14.9±9.10              | 0.222  |
| 17-HETE                      |     | 0.82±0.27               | 0.87±0.34               | 0.73±0.56                | 0.74±0.48              | 0.938  |
| 18-HETE                      |     | 1.67±0.45               | 1.18±0.42               | 1.16±0.38                | 1.23±0.55              | 0.207  |
| 20-HETE                      |     | 11.0±1.41               | 9.55±1.41               | 8.86±1.51                | 7.47±3.46              | 0.064  |
| 8-Iso-PGF <sub>2α</sub> III* |     | 1.35±0.21 <sup>a</sup>  | 1.37±0.16 <sup>a</sup>  | 1.39±0.42 <sup>a</sup>   | 0.74±0.29 <sup>b</sup> | 0.003  |
| 9-HOTrE                      | ALA | 3.54±0.59 <sup>a</sup>  | 4.53±0.66 <sup>a</sup>  | 4.12±1.26 <sup>a</sup>   | 2.15±0.40 <sup>b</sup> | <.001  |
| 9-OxoOTrE                    |     | 2.69±1.64               | 1.57±0.50               | 1.68±0.59                | 2.15±0.64              | 0.295  |
| 13-HOTrE                     |     | 4.02±0.74 <sup>b</sup>  | 5.33±1.02 <sup>a</sup>  | 4.54±0.62 <sup>ab</sup>  | 2.87±0.66 <sup>c</sup> | <.001  |
| PGE <sub>3</sub>             | EPA | 1.49±0.43 <sup>b</sup>  | 1.45±0.53 <sup>b</sup>  | 1.48±0.46 <sup>b</sup>   | 6.38±3.19 <sup>a</sup> | 0.005  |
| PGF <sub>3α</sub>            |     | 2.24±0.67 <sup>b</sup>  | 1.61±0.33 <sup>b</sup>  | 1.48±0.27 <sup>b</sup>   | 7.26±3.25 <sup>a</sup> | 0.001  |
| TXB <sub>3</sub>             |     | 0.19±0.13 <sup>bc</sup> | 0.01±0.07 <sup>d</sup>  | 0.12±0.08 <sup>bcd</sup> | 1.23±0.42 <sup>a</sup> | <0.001 |
| 8-HEPE                       |     | 1.95±0.92 <sup>b</sup>  | 2.10±0.58 <sup>b</sup>  | 1.98±0.50 <sup>b</sup>   | 15.6±2.90 <sup>a</sup> | 0.004  |
| 11-HEPE                      |     | 5.62±2.18 <sup>b</sup>  | 5.15±1.19 <sup>b</sup>  | 2.78±1.00 <sup>c</sup>   | 30.0±12.7 <sup>a</sup> | <0.001 |
| 12-HEPE                      |     | 6.91±1.41 <sup>b</sup>  | 5.23±1.15 <sup>b</sup>  | 2.35±0.67 <sup>c</sup>   | 30.7±9.81 <sup>a</sup> | <.001  |
| 15-HEPE                      |     | 5.53±2.26 <sup>b</sup>  | 5.21±1.27 <sup>b</sup>  | 3.70±1.43 <sup>b</sup>   | 51.2±22.9 <sup>a</sup> | 0.002  |
| 14,15-DiHETE                 |     | 21.9±8.15 <sup>b</sup>  | 20.4±2.52 <sup>b</sup>  | 17.9±6.36 <sup>b</sup>   | 241±51.5 <sup>a</sup>  | 0.005  |
| 17,18-DiHETE                 |     | 16.7±5.88 <sup>b</sup>  | 15.6±2.34 <sup>b</sup>  | 15.2±2.59 <sup>b</sup>   | 205±61.4 <sup>a</sup>  | 0.004  |
| 18-HEPE                      |     | 4.55±1.43 <sup>b</sup>  | 4.12±1.48 <sup>b</sup>  | 3.29±0.91 <sup>b</sup>   | 49.5±12.6 <sup>a</sup> | 0.002  |
| 4-HDoHE                      | DHA | 14.8±2.11 <sup>b</sup>  | 14.4±2.59 <sup>b</sup>  | 11.5±1.49 <sup>b</sup>   | 18.4±4.46 <sup>a</sup> | 0.005  |
| 7-HDoHE                      |     | 6.37±0.82 <sup>b</sup>  | 6.89±2.57 <sup>b</sup>  | 5.66±1.58 <sup>b</sup>   | 12.7±1.77 <sup>a</sup> | <.001  |
| 8-HDoHE                      |     | 16.7±3.77               | 13.5±3.28               | 11.8±3.75                | 19.9±6.32              | 0.028  |
| 10-HDoHE                     |     | 4.68±0.92 <sup>bc</sup> | 5.11±1.06 <sup>b</sup>  | 3.71±0.58 <sup>c</sup>   | 6.68±2.72 <sup>a</sup> | <.001  |
| 11-HDoHE                     |     | 7.43±1.18 <sup>b</sup>  | 7.67±1.53 <sup>b</sup>  | 5.98±0.99 <sup>b</sup>   | 9.94±2.86 <sup>a</sup> | 0.010  |
| 13-HDoHE                     |     | 12.3±4.91 <sup>b</sup>  | 11.1±1.23 <sup>b</sup>  | 9.45±4.04 <sup>c</sup>   | 16.8±4.11 <sup>a</sup> | <.001  |
| 14-HDoHE                     |     | 9.55±1.63 <sup>b</sup>  | 10.5±2.78 <sup>ab</sup> | 7.46±2.22 <sup>c</sup>   | 14.5±4.52 <sup>a</sup> | 0.006  |
| 16-HDoHE                     |     | 7.94±1.11 <sup>b</sup>  | 7.80±1.34 <sup>b</sup>  | 5.98±0.91 <sup>c</sup>   | 11.1±2.34 <sup>a</sup> | <.001  |
| 17-HDoHE                     |     | 24.1±5.93 <sup>ab</sup> | 28.3±7.72 <sup>a</sup>  | 20.4±4.60 <sup>bc</sup>  | 35.9±11.4 <sup>a</sup> | 0.003  |
| 16,17-DiHDoPE                |     | 0.87±0.19 <sup>b</sup>  | 0.83±0.11 <sup>b</sup>  | 1.05±0.12 <sup>b</sup>   | 1.34±0.35 <sup>a</sup> | 0.003  |
| 19,20-DiHDoPE                |     | 2.30±0.75               | 2.43±0.44               | 2.42±0.92                | 3.22±1.05              | 0.254  |
| 20-HDoHE                     |     | 11.8±1.99 <sup>b</sup>  | 11.1±1.81 <sup>b</sup>  | 9.86±2.19 <sup>b</sup>   | 16.7±3.64 <sup>a</sup> | <.001  |

Values are expressed as mean ng/g tissue ± SD. Differing lower case superscript letters indicate significant simple effect differences between values (p<0.008). Reference, healthy rats did not undergo tumor implantation nor received chemotherapy, consumed control diet only; Tumor, tumor bearing

animals did not receive chemotherapy, consumed control diet only; Chemo, tumor bearing animals received chemotherapy, consumed control diet only; Fish Oil, tumor bearing animals received chemotherapy, consumed fish oil diet.

Abbreviations: AA, Arachidonic acid; ALA, Alpha-linolenic acid; D $\gamma$ LA, Dihomo-gamma-linolenic acid; DHA, Docosahexaenoic acid; DiHDoHE, Dihydroxy-docosahexaenoic acid; DiHDPE, Dihydroxy-docosapentaenoic acid; DiHETrE, Dihydroxy-eicosatrienoic acid; DiHOME, Dihydroxy-octadecenoic acid; EPA, Eicosapentaenoic acid; HDoHE, Hydroxy-docosahexaenoic acid; HEPE, Hydroxy-eicosapentaenoic acid; HETE, Hydroxy-eicosatetraenoic acid; HETrE, Hydroxy-eicosatrienoic acid; HODE, Hydroxy-octadecadienoic acid; HOTrE, Hydroxy-octadecatrienoic acid; k, keto; LA, Linoleic acid; oxo-ETE, oxo-Eicosatetraenoic acid; oxo-ODE, oxo-Octadecadienoic acid; oxo-OTrE, oxo-Octadecatrienoic acid; PG, Prostaglandin; PUFA, polyunsaturated fatty acid; TriHOME, Trihydroxy-octadecenoic acid.

**Supplemental Table S2:** Liver cytokines.

|               | Reference                      | Tumor                          | Chemo                          | Chemo+Fish Oil                 | P-value |
|---------------|--------------------------------|--------------------------------|--------------------------------|--------------------------------|---------|
| Eotaxin       | 20.63 $\pm$ 1.54 <sup>ab</sup> | 21.05 $\pm$ 2.66 <sup>ab</sup> | 22.48 $\pm$ 0.77 <sup>a</sup>  | 18.81 $\pm$ 2.41 <sup>b</sup>  | 0.021   |
| IFN- $\gamma$ | 370.1 $\pm$ 21.2               | 376.7 $\pm$ 23.3               | 374.8 $\pm$ 73.1               | 388.9 $\pm$ 40.0               | 0.872   |
| IL-1 $\alpha$ | 154.8 $\pm$ 15.0               | 167.4 $\pm$ 13.6               | 186.4 $\pm$ 48.7               | 181.1 $\pm$ 16.2               | 0.122   |
| IL-1 $\beta$  | 570.3 $\pm$ 47.9               | 574.4 $\pm$ 40.2               | 623.1 $\pm$ 48.5               | 564.1 $\pm$ 48.3               | 0.108   |
| IL-6          | 2956 $\pm$ 507 <sup>b</sup>    | 2541 $\pm$ 376 <sup>b</sup>    | 3766 $\pm$ 793 <sup>a</sup>    | 2857 $\pm$ 688 <sup>b</sup>    | 0.009   |
| IL-10         | 296.6 $\pm$ 35.9 <sup>ab</sup> | 272.5 $\pm$ 28.2 <sup>b</sup>  | 323.1 $\pm$ 13.5 <sup>a</sup>  | 293.0 $\pm$ 31.8 <sup>ab</sup> | 0.038   |
| IL-17A        | 12.65 $\pm$ 3.71               | 12.94 $\pm$ 1.72               | 16.3 $\pm$ 4.84                | 13.80 $\pm$ 3.84               | 0.273   |
| IL-18         | 609.2 $\pm$ 79.9 <sup>ab</sup> | 662.8 $\pm$ 49.9 <sup>a</sup>  | 520.8 $\pm$ 85.9 <sup>bc</sup> | 494.0 $\pm$ 33.8 <sup>c</sup>  | <.001   |
| TNF- $\alpha$ | 11.53 $\pm$ 2.11 <sup>b</sup>  | 8.560 $\pm$ 1.06 <sup>c</sup>  | 16.49 $\pm$ 2.54 <sup>a</sup>  | 15.26 $\pm$ 2.46 <sup>a</sup>  | <.002   |

Values are expressed as mean pg/mL tissue  $\pm$  SD. Differing lower case superscript letters indicate significant simple effect differences between values ( $p < 0.05$ ). Reference, healthy rats did not undergo tumor implantation nor received chemotherapy, consumed control diet only; Tumor, tumor bearing animals did not receive chemotherapy, consumed control diet only; Chemo, tumor bearing animals received chemotherapy, consumed control diet only; Fish Oil, tumor bearing animals received chemotherapy, consumed fish oil diet.

MCP-1 was below the detection limit of the assay for all groups.

Abbreviation: IFN- $\gamma$ , interferon gamma; IL, interleukin; MCP-1, monocyte chemoattractant protein 1; TNF- $\alpha$ , tumor necrosis factor alpha.
